# Supplementary material for: Altered DNA methylation profiles in blood from patients with sporadic Creutzfeldt–Jakob disease
Source: Acta Neuropathol. 2020 Sep 12;140(6):863–79. doi: 10.1007/s00401-020-02224-9 (PMC7666287; doi:10.1007/s00401-020-02224-9)
Supplement: Supplementary file 1 — Additional file1 (PDF 26864 kb) [file 401_2020_2224_MOESM1_ESM.pdf]

## **Altered DNA methylation profiles in blood from patients with sporadic Creutzfeldt-Jakob disease**

Luke Dabin<sup>1‡</sup>, Fernando Guntoro<sup>1‡</sup>, Tracy Campbell<sup>1</sup>, Tony Bélicard<sup>2</sup>, Adam R. Smith<sup>3</sup>, Rebecca G. Smith<sup>3</sup>, Rachel Raybould<sup>4</sup>, Jonathan M. Schott<sup>5</sup>, Katie Lunnon<sup>3</sup>, Peter Sarkies<sup>2</sup>, John Collinge<sup>1</sup>, Simon Mead<sup>1</sup> and Emmanuelle Viré<sup>1</sup>.

‡Denotes equal contribution

Corresponding author: [s.mead@ucl.ac.uk](mailto:s.mead@ucl.ac.uk)

1. MRC Prion Unit at UCL, UCL Institute of Prion Diseases, Courtauld Building, London, W1W 7FF, UK.
2. MRC London Institute of Medical Sciences, London W12 0NN, UK; Institute of Clinical Sciences, Imperial College London, London W12 0NN, UK.
3. College of Medicine and Health, University of Exeter Medical School, Exeter University, RILD Building Level 4, Royal Devon and Exeter Hospital, Barrack Rd, Exeter, EX2 5DW, UK.
4. Institute of Psychological Medicine and Clinical Neurosciences, Cardiff University, Cardiff, UK
5. Dementia Research Centre, UCL Institute of Neurology, University College London, London, UK.

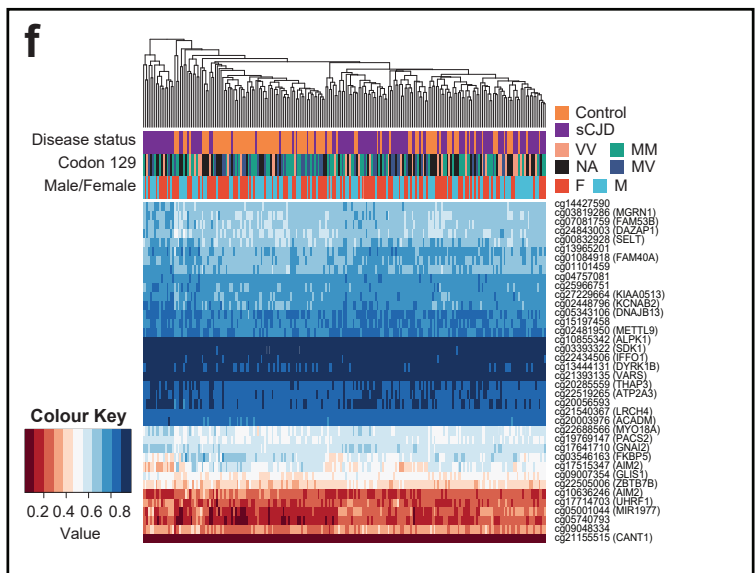

### **Supplementary Figure 1: Genome-wide methylation profiling in sporadic CJD blood.**

(a) Graphical representation of quality control steps; 82158 probes and one sample were excluded after performing the `champ.load()` function. (b) Scree plot showing the percentage of total variance in the methylation profiles as represented by the top 10 most contributing PCs (cell type corrected) before cell type correction. (c) Principal component analysis (PCA) showing the first (PC1) and second (PC2) principal components (PC) for 219 DNA methylation profiles after cell type correction with Housemann algorithm. Control samples (orange) and sCJD cases (purple). (d) Scree plot showing the percentage of total variance in the methylation profiles as represented by the top 10 most contributing PCs (cell type corrected) after cell type correction with Housemann algorithm. (e) Volcano plot showing differences in methylation levels between sCJD and control after cell type correction. (f) Dendrogram showing hierarchical clustering of the 38 significant DMPs. Hierarchical clustering analysis was performed using the average clustering method based on Euclidean distance. Disease status: orange (control), purple (sCJD); codon 129 status: MM (green), MV (dark blue), VV (pink), unknown (black); sex: male (blue), female (red).

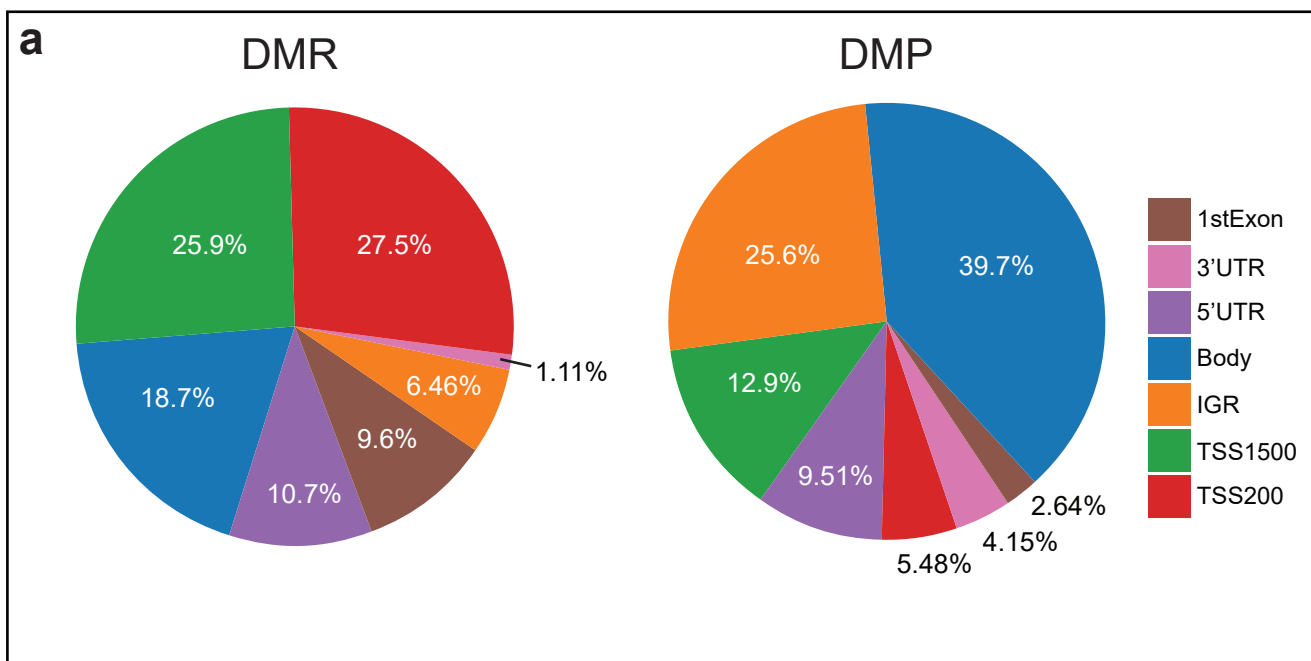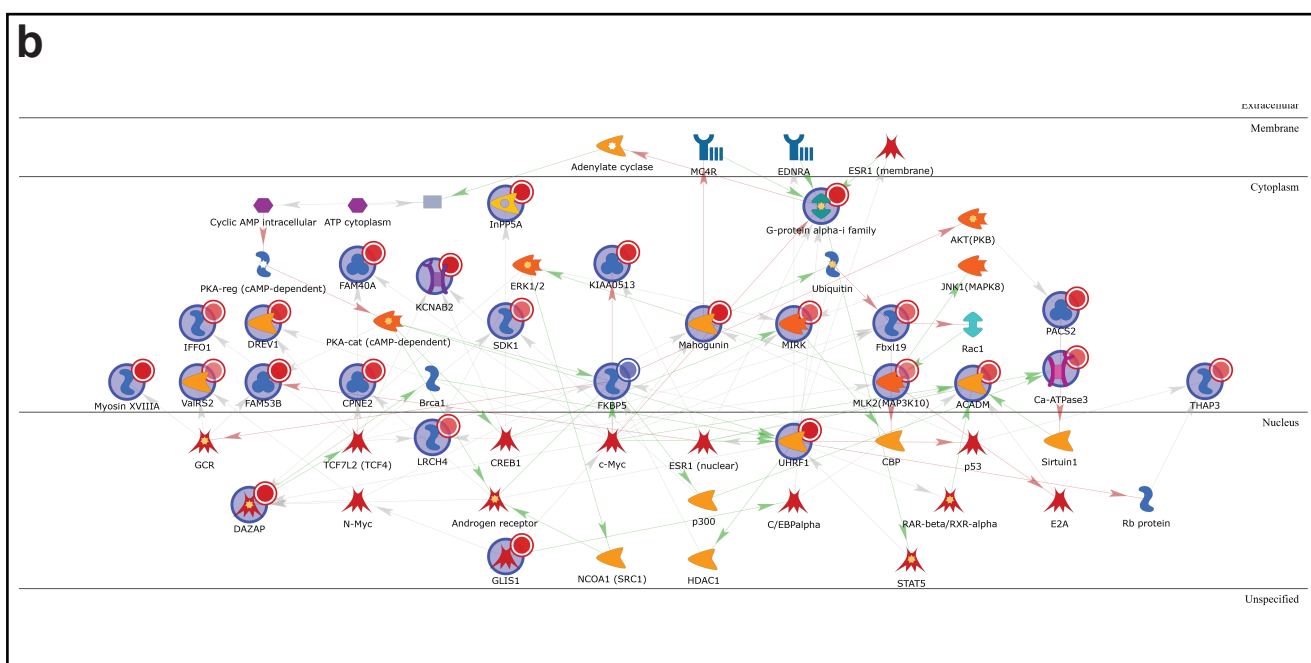

**Supplementary Figure 2: Characterization of DMPs and DMRs.**

(a) Distribution of CpGs in the 38 DMPs (right) and 67 DMRs (left). The segments are ordered according to the size of proportions. TSS 1500: located 1500 nucleotides upstream transcriptional start site; TSS 200: located 1500 nucleotides upstream transcriptional start site; Body: body of the gene; IGR: intergenic regions; 5'UTR and 3'UTR are respectively 5' and 3' untranslated regions. (b) Pathways affected by changes in DNA methylation in sCJD. Molecules are stratified by subcellular localisation. Green arrows represent activation, red represent inhibition, and grey arrows represent unspecific interaction. Molecules encircled in blue are from the methylation dataset. Upper-right coloured circles represent effect direction, with red circles indicating hypermethylation and blue circles representing hypomethylation in sCJD. Proteins are represented by blue molecular shapes, enzymes are represented by yellow and orange shapes, and transcription factors are represented by red shapes.



**Supplementary Figure 3: Correlation between 38 DMPs and disease-modifying features.**

(a) Manhattan plot of probes associated with *PRNP* codon 129 polymorphism. Red line indicates significance threshold (Bonferroni-adjusted =  $1.24 \times 10^{-7}$ ). X-axis represents ranked chromosomes, Y-axis represents  $-\log_{10}$  (p-value). (b) Manhattan plot of probes associated with age at onset. Cases are binned in three groups: onset before 60 years old; onset between 60 and 70 years old; onset after 70 years old. Red line indicates significance threshold (Bonferroni-adjusted =  $1.24 \times 10^{-7}$ ). X-axis represents ranked chromosomes, Y-axis represents  $-\log_{10}$  (p-value). (c) Manhattan plot of probes associated with disease duration. Cases are binned in three groups: less than 100 days, longer than 200 days, or between 100 and 200 days. Red line indicates significance threshold (Bonferroni-adjusted =  $1.24 \times 10^{-7}$ ). X-axis represents ranked chromosomes, Y-axis represents  $-\log_{10}$  (p-value). (d) Manhattan plot of probes associated with patient's score measured at the time each sample was collected. Red line indicates significance threshold (Bonferroni-adjusted =  $1.24 \times 10^{-7}$ ). X-axis represents ranked chromosomes, Y-axis represents  $-\log_{10}$  (p-value). (e) Correlation between the patient's score measured at the time each sample was collected with the methylation values at each DMP.

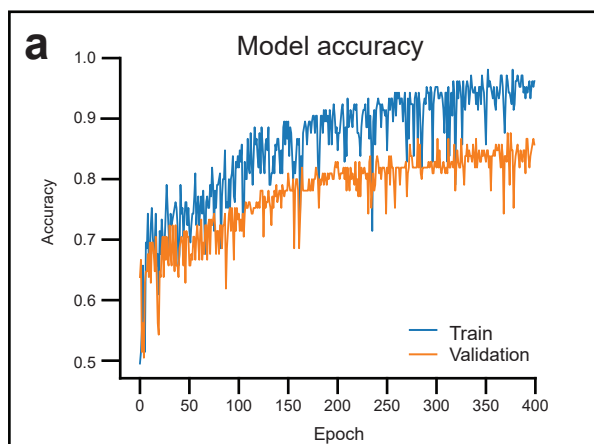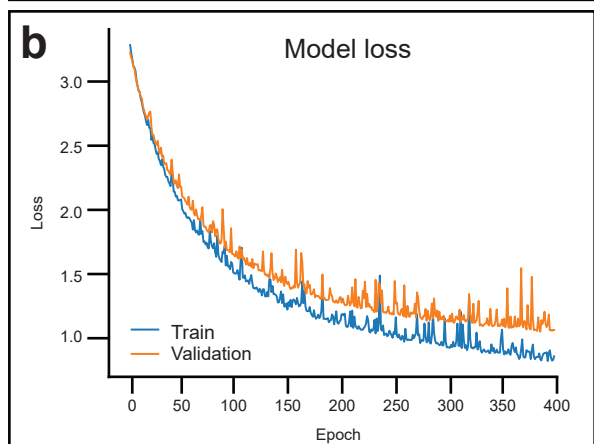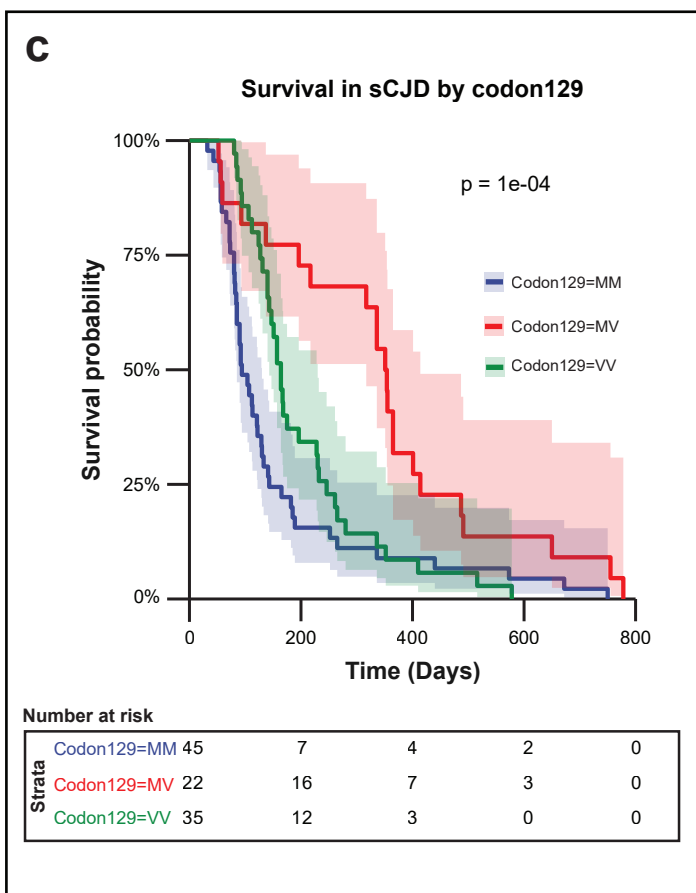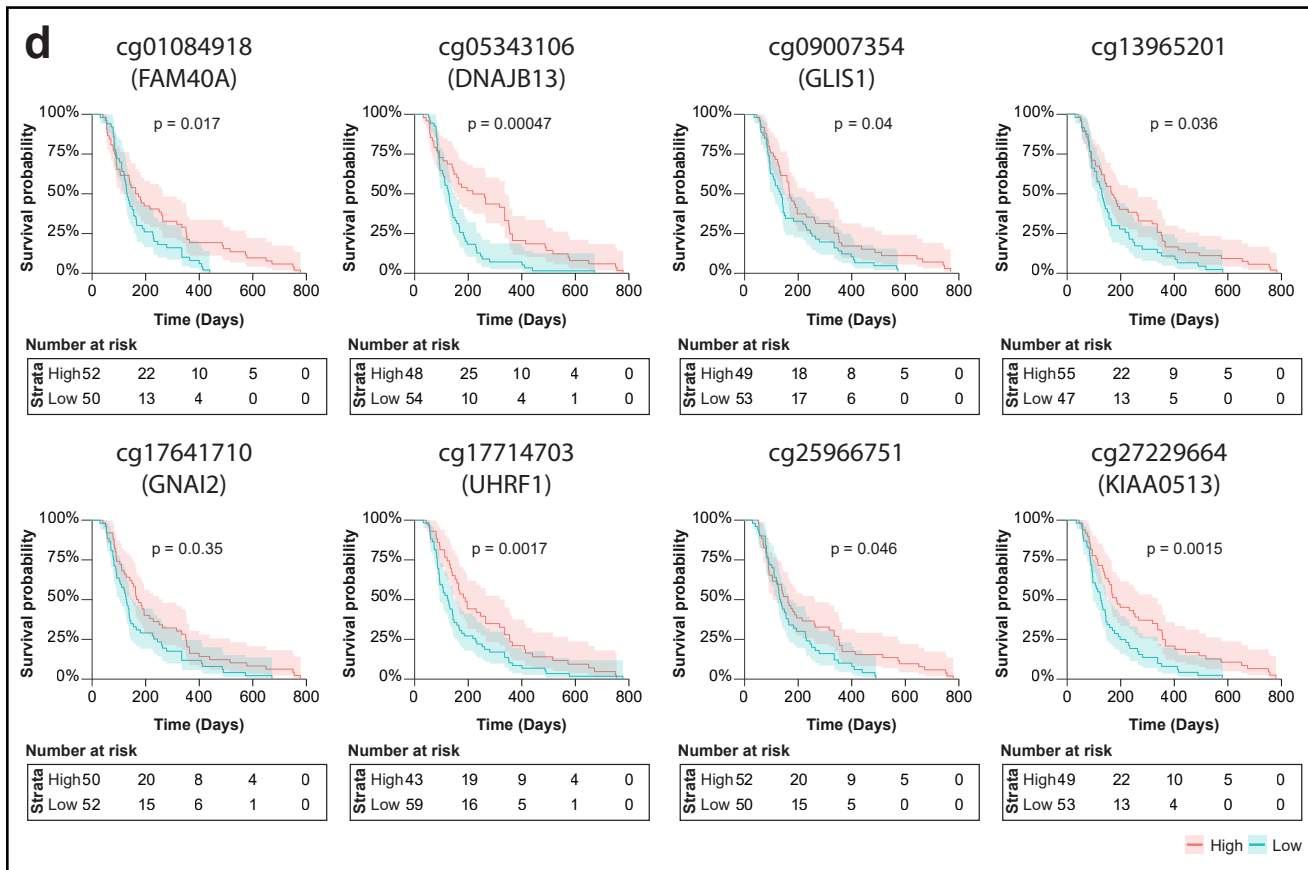

**Supplementary Figure 4: DNA methylation array profiles to refine sCJD diagnosis and disease duration.**

Performance of DNA methylation-based neural network classifier in sCJD. **(a)** Model accuracy during training process over 400 epochs. **(b)** Model loss during the training process. The loss is defined as binary cross-entropy. **(c)** Kaplan-Meier survival analysis. sCJD patients were divided into 3 groups based on the genotype at PRNP codon 129 (MM, VV or MV). **(d)** Survival analysis for 8 sites. Patients were divided into high (above median; red) and low (below media; green) DNA methylation values at each DMP. *p*-values were calculated using the log-rank test.
